# Supplementary material for: Key determinants of VDAC-hexokinase I complex assembly revealed by a minimal vesicle-based interaction assay
Source: Research Square preprint supplement (doi:10.21203/rs.3.rs-8079261/v1), 2026-01-09
Supplement: Supplementary file 1 [file cbc7dd185319cbd29004fe64.pdf]

## **Supplementary Information**

### **Key determinants of VDAC-hexokinase I complex assembly revealed by a minimal vesicle-based interaction assay**

**Authors:** Milena Wessing<sup>1,2</sup>, Isabelle Watrinet<sup>2,3</sup>, Michael Timme<sup>1,2</sup>, Britta Fiedler<sup>1,2</sup>, Manel N. Melo<sup>4</sup>, Jacob Piehler<sup>2,3</sup>, Joost C. M. Holthuis<sup>1,2</sup>

**Affiliations:**

<sup>1</sup>Division of Molecular Cell Biology, Department of Biology/Chemistry, Osnabrück University, 49076 Osnabrück, Germany.

<sup>2</sup>Center for Cellular Nanoanalytics, Osnabrück University, 49076 Osnabrück, Germany.

<sup>3</sup>Division of Biophysics, Department of Biology/Chemistry, Osnabrück University, 49076 Osnabrück, Germany.

<sup>4</sup>Instituto de Tecnologia Química e Biológica António Xavier, Universidade Nova de Lisboa, Av. da República, 2780-157 Oeiras, Portugal.

**This PDF file includes:**

Supplementary Figs. 1 to 4

Supplementary Table 1

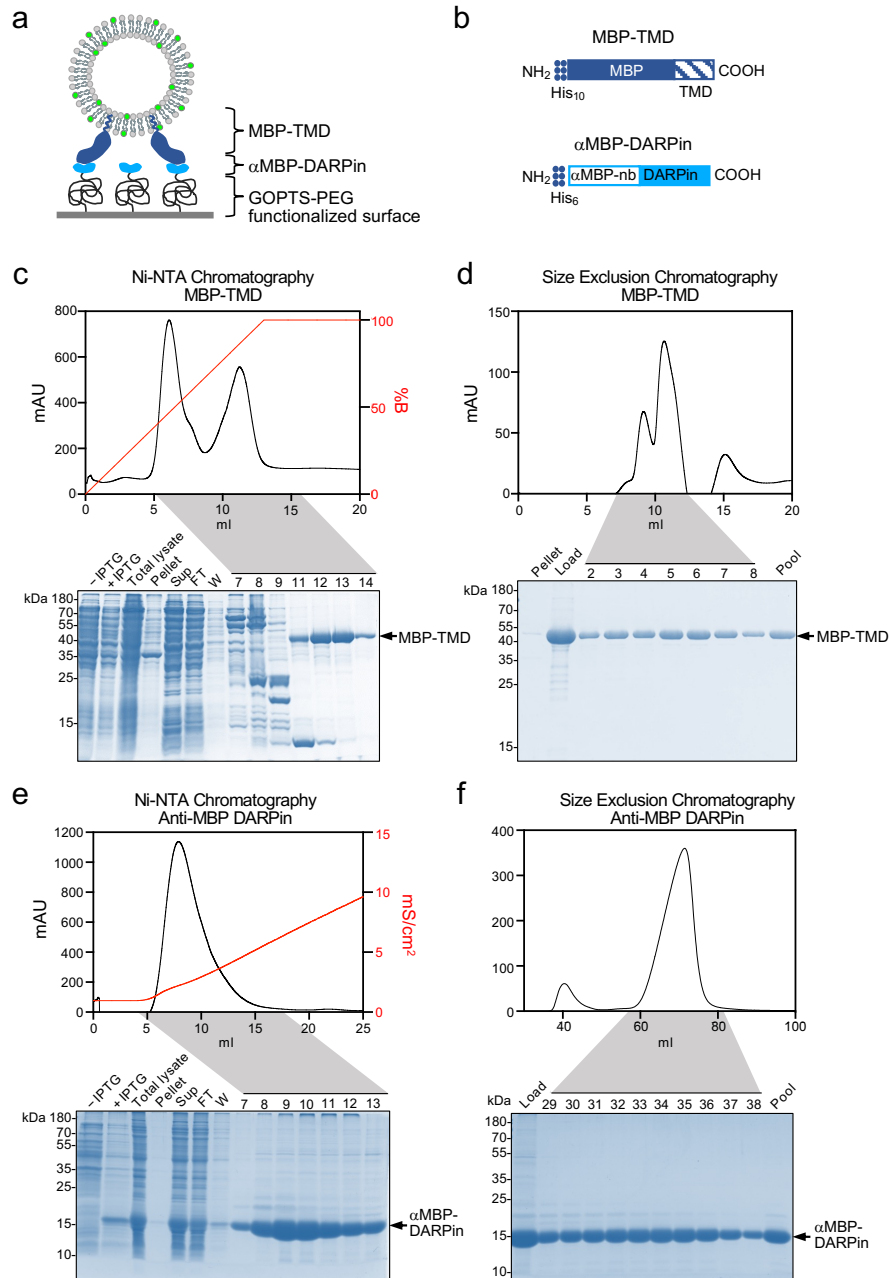

### Supplementary Figure 1 | Purification of MBP-TMD and αMBP-DARPin.

(a) Cartoon of vesicle containing maltose binding protein fused to a transmembrane domain (MBP-TMD) captured on a glass coverslip decorated with αMBP-DARPin via crosslinking to GOPTS-PEG-NHS maleimide.

(b) Schematic outline of the MBP-TMD and αMBP-DARPin proteins used for capturing vesicles to glass surface as in (a).

(c) Ni-NTA chromatography of MBP-TMD upon its IPTG-induced expression in *E. coli*. After binding to the Ni-NTA matrix, MBP-TMD was released using a linear imidazole gradient. Expression, release from

bacterial lysates, and Ni-NTA chromatography of MBP-TMD was monitored by SDS-PAGE and CB staining. Sup, supernatant; FT, flow through.

(d) MBP-TMD affinity-purified by Ni-NTA chromatography was loaded onto a size exclusion column. Peak fractions were analyzed by SDS-PAGE and CB staining.

(e) Ni-NTA chromatography of  $\alpha$ MBP-DARPin upon its IPTG-induced expression in *E. coli*. After binding to the Ni-NTA matrix,  $\alpha$ MBP-DARPin was released using a linear imidazole gradient. Expression, release from bacterial lysates, and Ni-NTA chromatography of  $\alpha$ MBP-DARPin was monitored by SDS-PAGE and CB staining.

(f)  $\alpha$ MBP-DARPin affinity purified by Ni-NTA chromatography was loaded onto a size exclusion column. Peak fractions were analyzed by SDS-PAGE and CB staining.

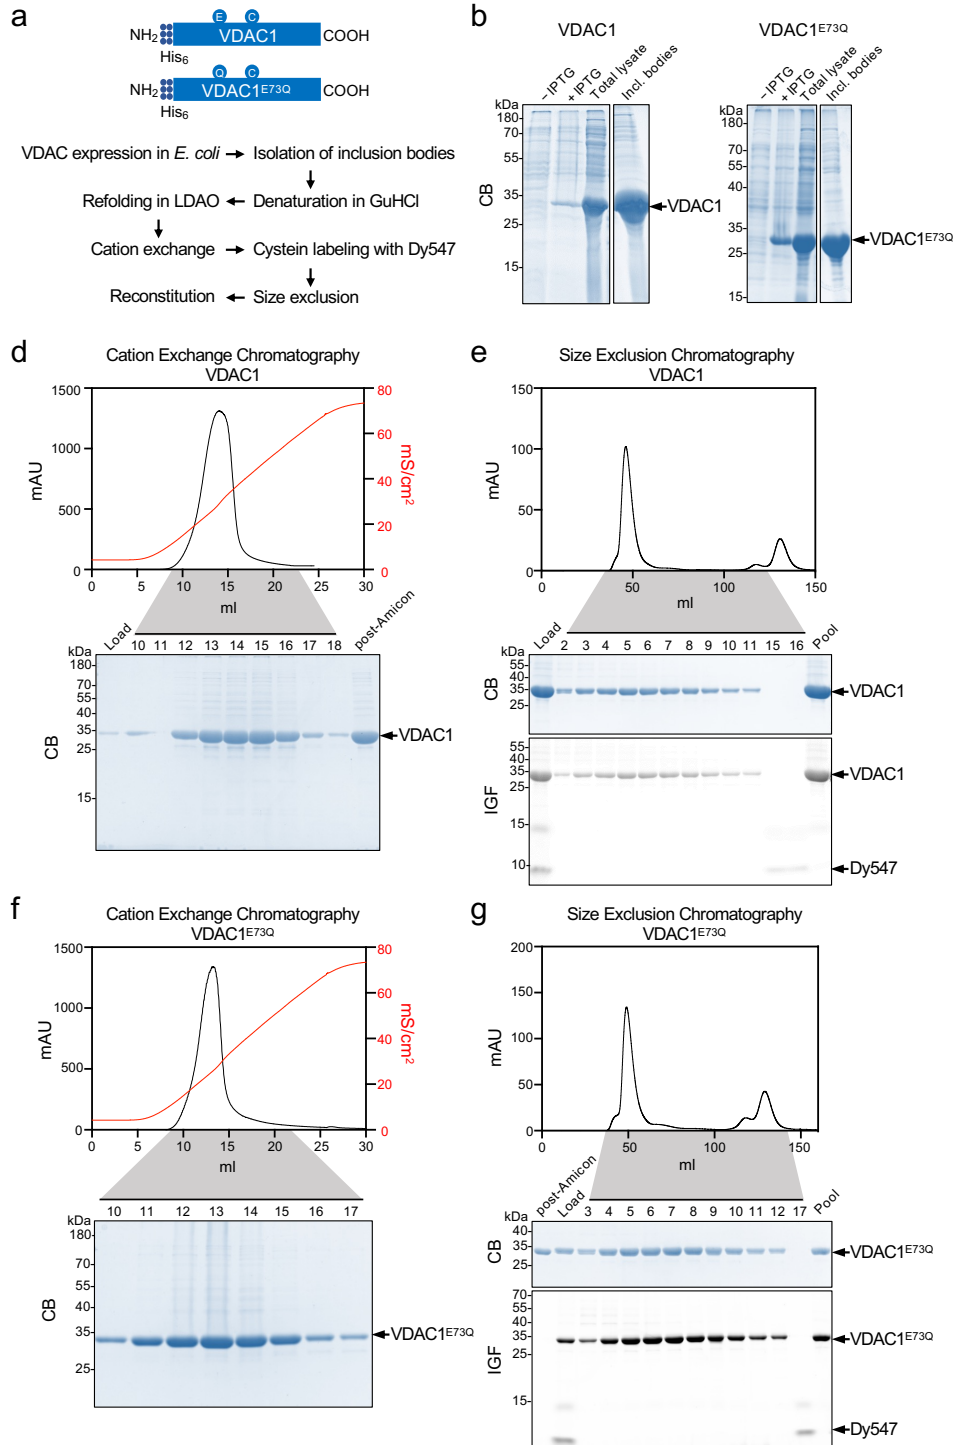

### Supplementary Figure 2 | Purification and cysteine labelling of VDAC1 and VDAC1<sup>E73Q</sup>

(a) Schematic outline of the production, purification and cysteine-labeling of recombinant human VDAC1 using an IPTG-inducible bacterial expression construct encoding single cysteine VDAC1 (C127S, A134C, C232S) or its HKI binding-deficient variant VDAC1<sup>E73Q</sup> (E73Q, C127S, A134C, C232S) tagged with a *N*-terminal His-tag.

**(b)** Inclusion bodies isolated from *E. coli* following IPTG-induced expression of VDAC1 or VDAC1<sup>E73Q</sup> were analyzed by SDS-PAGE and CB staining.

**(c)** VDAC1 solubilized from inclusion bodies was refolded, loaded onto a cation exchange column and released using a linear salt gradient. Cation exchange chromatography of VDAC1 was monitored by SDS-PAGE and CB staining. Peak fractions were pooled and concentrated using an Amicon filter (post Amicon).

**(d)** VDAC1 purified by cation exchange chromatography was cysteine-labeled with DY-547P1 and loaded onto a size exclusion column. Peak fractions were analyzed by SDS-PAGE, CB staining and in-gel-fluorescence (IGF) analysis.

**(e)** Cation exchange chromatography of VDAC1<sup>E73Q</sup> performed as in (c).

**(f)** Size exclusion chromatography of Dy-547P1-labelled VDAC1<sup>E73Q</sup> performed as in (d).

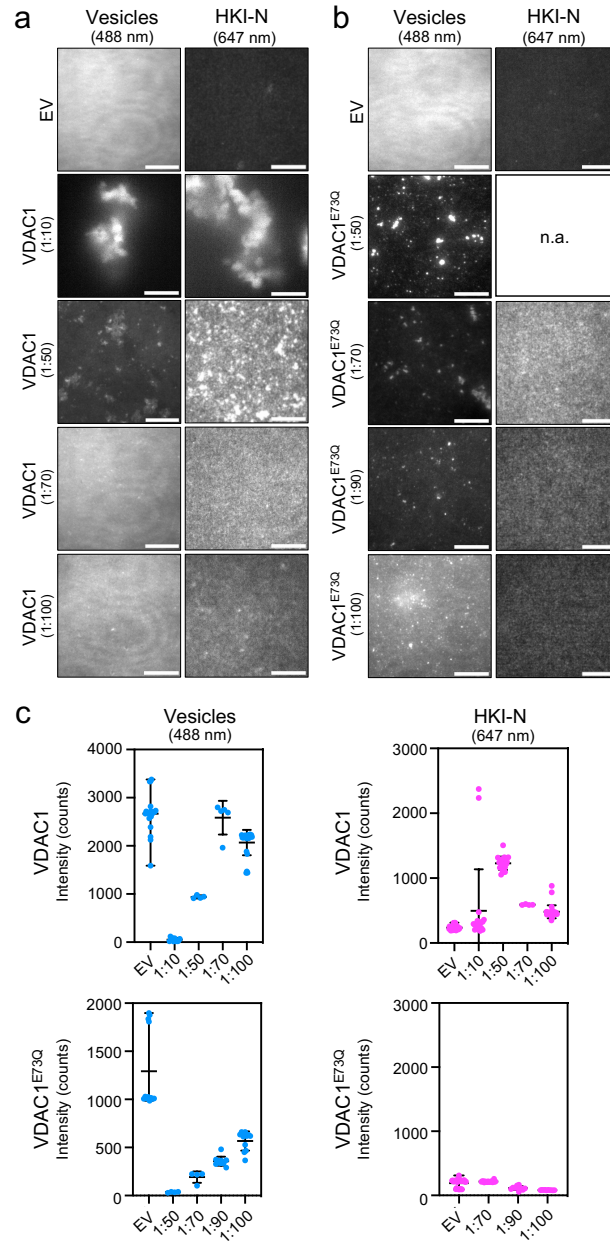

### Supplementary Figure 3 | Protein-lipid ratio optimization for reconstitution of MBP-TMD and VDAC1 in proteoliposomes.

(a, b) Vesicles containing MBP-TMD in combination with VDAC1 or VDAC1<sup>E73Q</sup> were prepared using molar protein:lipid reconstitution ratios of 1:500 for MBP-TMD and the indicated ratios for VDAC1 and VDAC1<sup>E73Q</sup> in eggPC:DHPE-OG488 (99.5:0.5). Vesicles were captured on  $\alpha$ MBP-DARPin-decorated coverslips, incubated with 200nM HK-N<sup>647</sup> and analyzed for OG488 and HK-N<sup>647</sup> fluorescence using TIRF microscopy.

(c) Intensity plots of OG488 (*blue*) and HK-N<sup>647</sup> (*magenta*) fluorescence on the surface of coverslips as in (a, b). Data shown are intensities measured in 4-12 different areas on the surface of one cover slip per condition and representative of three independent experiments.

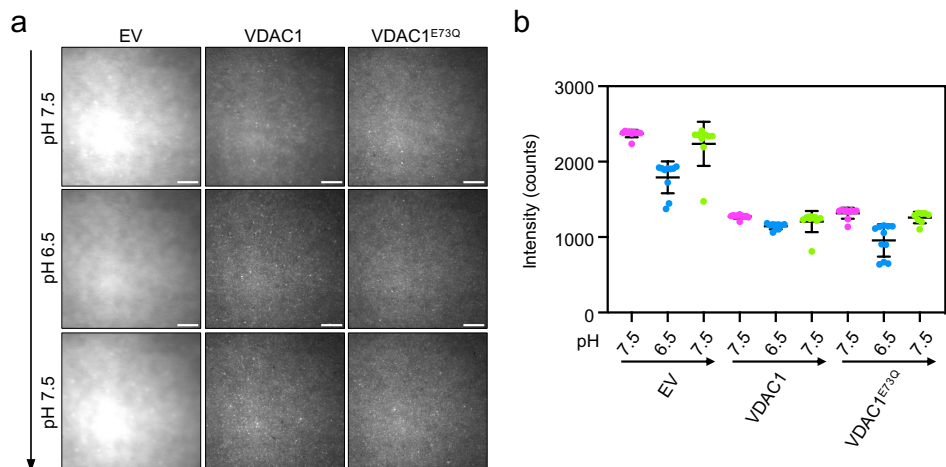

**Supplementary Figure 4 | Mild acidification does not affect binding of VDAC-containing vesicles to αMBP-DARPin-decorated coverslips.**

**(a)** Vesicles prepared by (co)-reconstitution of MBP-TMD, VDAC1 and/or VDAC1<sup>E73Q</sup> at molar protein:lipid reconstitution ratios of 1:500 (MBP-TMD), 1:50 (VDAC1) and 1:100 (VDAC1<sup>E73Q</sup>) in eggPC:DHPE-OG488 (99.5:0.5) were captured on αMBP-DARPin-decorated coverslips in pH 7.5 buffer. After 5 min, OG488 fluorescence levels were measured by TIRF microscopy. Incubation was then continued in pH 6.5 buffer for 5 min before measuring OG488 fluorescence levels again. This procedure was then repeated once more in pH 7.5 buffer.

**(b)** Intensity plots of OG488 fluorescence on the surface of coverslips treated as in (a). Data shown are intensities measured in 5-10 different areas on the surface of one cover slip per condition and representative of three independent experiments.

**Supplementary Table 1. Primers used for cloning and site-directed mutagenesis.**

| <b>Primer name</b> | <b>Primer sequence (5'-3')</b>                            |
|--------------------|-----------------------------------------------------------|
| pColdI-hVDAC1 F    | ATCATATCGAAGGTAGGCACGCTGTGCCACCCAC                        |
| pColdI-hVDAC1 R    | GCTTTTAAGCAGAGATTACCTATTTATGCTTGAAATTCCAGTCCTAGA<br>CCAAG |
| hVDAC1-E73Q F      | ATGGACTGAGTACGGCCTGACGTTTACACAGAAATGGAATACCGAC            |
| hVDAC1-E73Q R      | GTCGGTATTCCATTTCTGTGTAAACGTCAGGCC                         |
| hVDAC1 A134C F     | TTTCGACATTTGCGGGCCTTCCATCCGGGG                            |
| hVDAC1 A134C R     | TCCATGTCGCTGCCCAGG                                        |
